# Supplementary material
Source: Springer Nature journal article supplement (https://www.springermedizin.de/resource/supplementary/12889_2011_3499_MOESM1_ESM.pdf/9489226)

# Total serum homocysteine ( $\mu\text{mol/L}$ )

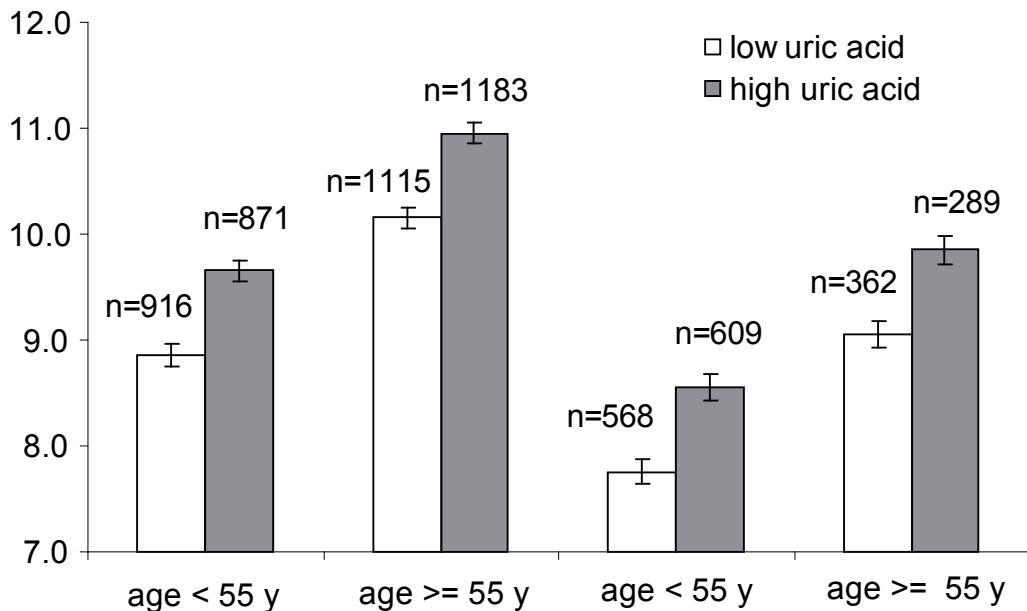

MDRR < 90  
ml/min/1.73 m<sup>2</sup>

MDRR  $\geq$  90  
ml/min/1.73 m<sup>2</sup>

Supplement: MOESM1 [file 9489226]
